# Supplementary material
Source: PubMed Central journal article supplement (PMC4573448)
Supplement: mmc1.pdf [file mmc1.pdf]

The American Journal of Human Genetics

Supplemental Data

**A Fast Method that Uses Polygenic Scores to Estimate  
the Variance Explained by Genome-wide Marker Panels  
and the Proportion of Variants Affecting a Trait**

Luigi Palla and Frank Dudbridge

|                                       | Association between score and disease<br>(Stahl et al., 2012) |                     |                    |                     |                          | Association between score and disease (Schizophrenia Working Group of the Psychiatric Genomics Consortium, 2014) |                     |                      |
|---------------------------------------|---------------------------------------------------------------|---------------------|--------------------|---------------------|--------------------------|------------------------------------------------------------------------------------------------------------------|---------------------|----------------------|
| <i>P</i> -value interval              | RA                                                            | CD                  | MI                 | T2D                 | <i>P</i> -value interval | SCZ-ISC                                                                                                          | SCZ-PGC1            | SCZ-PGC2             |
| [0,10 <sup>-4</sup> ]                 | 9×10 <sup>-6</sup>                                            | 2×10 <sup>-16</sup> | 1×10 <sup>-6</sup> | 1×10 <sup>-19</sup> | [0,5×10 <sup>-8</sup> ]  | -                                                                                                                | 2×10 <sup>-4</sup>  | 1×10 <sup>-23</sup>  |
| (10 <sup>-4</sup> ,10 <sup>-3</sup> ] | 0.03                                                          | 0.001               | 0.05               | 1×10 <sup>-4</sup>  | [0,10 <sup>-6</sup> ]    | 3×10 <sup>-4</sup>                                                                                               | 4×10 <sup>-5</sup>  | 4×10 <sup>-36</sup>  |
| (10 <sup>-3</sup> ,0.01]              | 5×10 <sup>-4</sup>                                            | 8×10 <sup>-6</sup>  | 6×10 <sup>-5</sup> | 7×10 <sup>-10</sup> | [0,10 <sup>-4</sup> ]    | 2×10 <sup>-10</sup>                                                                                              | 9×10 <sup>-12</sup> | 2×10 <sup>-71</sup>  |
| (0.01,0.05]                           | 2×10 <sup>-6</sup>                                            | 5×10 <sup>-9</sup>  | 5×10 <sup>-6</sup> | 3×10 <sup>-7</sup>  | [0,10 <sup>-3</sup> ]    | 2×10 <sup>-16</sup>                                                                                              | 2×10 <sup>-29</sup> | 8×10 <sup>-103</sup> |
| (0.05,0.1]                            | 0.1                                                           | 0.003               | 0.005              | 8×10 <sup>-5</sup>  | [0,0.01]                 | 1×10 <sup>-18</sup>                                                                                              | 3×10 <sup>-48</sup> | 2×10 <sup>-138</sup> |
| (0.1,0.2]                             | 0.2                                                           | 0.001               | 0.2                | 0.02                | [0,0.05]                 | 1×10 <sup>-22</sup>                                                                                              | 1×10 <sup>-63</sup> | 1×10 <sup>-164</sup> |
| (0.2,0.3]                             | 0.5                                                           | 0.003               | 0.2                | 0.1                 | [0,0.1]                  | 6×10 <sup>-26</sup>                                                                                              | 7×10 <sup>-70</sup> | 6×10 <sup>-166</sup> |
| (0.3,0.4]                             | 0.01                                                          | 0.06                | 0.01               | 0.2                 | [0,0.2]                  | 1×10 <sup>-27</sup>                                                                                              | 8×10 <sup>-74</sup> | 4×10 <sup>-164</sup> |
| (0.4,0.5]                             | 0.03                                                          | 0.08                | 0.3                | 0.02                | [0,0.5]                  | 1×10 <sup>-26</sup>                                                                                              | 1×10 <sup>-73</sup> | 8×10 <sup>-159</sup> |
|                                       |                                                               |                     |                    |                     | [0,1]                    | 6×10 <sup>-27</sup>                                                                                              | 2×10 <sup>-74</sup> | 2×10 <sup>-157</sup> |

**Table S1:** *P*-value selection intervals and *P*-values for association between the corresponding polygenic scores and each of the diseases presented in Table 1. RA, rheumatoid arthritis; CD, celiac disease; MI, myocardial infarction; T2D, type II diabetes; SCZ, schizophrenia. ISC, International Schizophrenia Consortium; PGC, Psychiatric Genomics Consortium.

| Criterion                                          | Threshold     | PLINK2 flag        |
|----------------------------------------------------|---------------|--------------------|
| Pairwise relatedness                               | 0.025         | --rel-cutoff 0.025 |
| Subject missingness                                | 0.03          | --mind 0.03        |
| Subject heterozygosity                             | <0.23 or >0.3 | --het              |
| Genotype call rate                                 | 0.01          | --geno 0.01        |
| Hardy-Weinberg <i>P</i> -value in combined NBS+58C | 5e-7          | --hwe 5e-7         |
| Minor allele frequency                             | 0.01          | --maf 0.01         |

**Table S2:** Quality control criteria used in analysis of WTCCC data.

|                          | Estimation of $\sigma_1^2, \pi_{01}$ |        |        |        | Estimation of $\sigma_1^2, \pi_{01}, \sigma_{12}$ |       |       |       |
|--------------------------|--------------------------------------|--------|--------|--------|---------------------------------------------------|-------|-------|-------|
|                          | RA                                   | CD     | MI     | T2D    | RA                                                | CD    | MI    | T2D   |
| True $\sigma_1^2$        | 0.180                                | 0.440  | 0.480  | 0.490  | 0.180                                             | 0.440 | 0.480 | 0.490 |
| Mean $\hat{\sigma}_1^2$  | 0.181                                | 0.441  | 0.485  | 0.492  | 0.370                                             | 0.607 | 0.652 | 0.619 |
| SD $\hat{\sigma}_1^2$    | 0.018                                | 0.029  | 0.043  | 0.030  | 0.335                                             | 0.323 | 0.327 | 0.318 |
| Coverage                 | 0.95                                 | 0.95   | 0.95   | 0.96   | 0.40                                              | 0.91  | 0.90  | 0.93  |
|                          |                                      |        |        |        |                                                   |       |       |       |
| True $\pi_{01}$          | 0.972                                | 0.972  | 0.979  | 0.961  | 0.958                                             | 0.972 | 0.979 | 0.961 |
| Mean $\hat{\pi}_{01}$    | 0.972                                | 0.972  | 0.980  | 0.962  | 0.960                                             | 0.967 | 0.976 | 0.957 |
| SD $\hat{\pi}_{01}$      | 0.0049                               | 0.0033 | 0.0031 | 0.0041 | 0.028                                             | 0.014 | 0.009 | 0.017 |
| Coverage                 | 0.95                                 | 0.95   | 0.96   | 0.96   | 0.95                                              | 0.93  | 0.93  | 0.94  |
|                          |                                      |        |        |        |                                                   |       |       |       |
| True $\sigma_{12}$       | -                                    | -      | -      | -      | 0.180                                             | 0.440 | 0.480 | 0.490 |
| Mean $\hat{\sigma}_{12}$ | -                                    | -      | -      | -      | 0.200                                             | 0.454 | 0.500 | 0.514 |
| SD $\hat{\sigma}_{12}$   | -                                    | -      | -      | -      | 0.036                                             | 0.040 | 0.050 | 0.068 |
| Coverage                 | -                                    | -      | -      | -      | 0.96                                              | 0.98  | 0.98  | 0.998 |

**Table S3: Application of AVENGEME to independently simulated  $\chi^2$  statistics for each selection interval, for 4 genetic models shown in Table 1.** Mean and standard deviation of parameter estimates and coverage of 95% confidence interval are shown over 1000 simulations. Monte Carlo error for the mean is  $SD/\sqrt{1000}$  and for coverage of 0.95 is 0.007.

|                                     | 3 Intervals | 5 Intervals | 10 Intervals | 20 Intervals | 40 Intervals |
|-------------------------------------|-------------|-------------|--------------|--------------|--------------|
| Mean $\hat{\sigma}_1^2$<br>(0.3)    | 0.532       | 0.459       | 0.448        | 0.405        | 0.302        |
| SD $\hat{\sigma}_1^2$               | 0.45        | 0.435       | 0.430        | 0.413        | 0.364        |
| Coverage                            | 1           | 0.996       | 0.994        | 0.997        | 0.997        |
| Mean $\hat{\pi}_{01}$<br>(0.95)     | 0.912       | 0.926       | 0.930        | 0.938        | 0.953        |
| SD $\hat{\pi}_{01}$                 | 0.085       | 0.076       | 0.069        | 0.062        | 0.053        |
| Coverage                            | 1           | 0.991       | 0.992        | 0.989        | 0.991        |
| Mean $\hat{\sigma}_{12}$<br>(0.294) | 0.288       | 0.286       | 0.287        | 0.288        | 0.296        |
| SD $\hat{\sigma}_{12}$              | 0.038       | 0.039       | 0.038        | 0.038        | 0.037        |
| Coverage                            | 0.97        | 0.959       | 0.955        | 0.961        | 0.964        |
|                                     |             |             |              |              |              |
| Mean $\hat{\sigma}_2^2$<br>(0.45)   | 0.534       | 0.484       | 0.502        | 0.451        | 0.351        |
| SD $\hat{\sigma}_2^2$               | 0.446       | 0.428       | 0.429        | 0.420        | 0.387        |
| Coverage                            | 1           | 0.987       | 0.992        | 0.991        | 0.989        |
| Mean $\hat{\pi}_{02}$<br>(0.94)     | 0.928       | 0.935       | 0.933        | 0.939        | 0.952        |
| SD $\hat{\pi}_{02}$                 | 0.062       | 0.058       | 0.058        | 0.056        | 0.050        |
| Coverage                            | 1           | 0.986       | 0.985        | 0.985        | 0.988        |
| Mean $\hat{\sigma}_{12}$<br>(0.294) | 0.286       | 0.285       | 0.287        | 0.288        | 0.295        |
| SD $\hat{\sigma}_{12}$              | 0.037       | 0.038       | 0.038        | 0.038        | 0.036        |
| Coverage                            | 0.97        | 0.957       | 0.956        | 0.963        | 0.968        |

**Table S4** : Unidirectional AVENGEME performance for estimating three parameters (true values in parentheses), under the bivariate simulation with  $N_1=N_2=5000$  (see main text). Estimation in each direction is shown. Monte Carlo error for the mean is  $SD/\sqrt{1000}$  and for coverage of 0.95 is 0.007. The  $P$ -value selection thresholds, for disjoint intervals, are as follows:

**3 intervals:** 0,  $10^{-3}$ , 0.2, 1;

**5 intervals:** 0,  $10^{-6}$ ,  $10^{-3}$ , 0.05, 0.2, 1;

**10 intervals:** 0,  $5 \times 10^{-8}$ ,  $10^{-6}$ ,  $10^{-4}$ ,  $10^{-3}$ , 0.01, 0.05, 0.1, 0.2, 0.5, 1;

**20 intervals:** 0,  $10^{-8}$ ,  $5 \times 10^{-8}$ ,  $10^{-7}$ ,  $10^{-6}$ ,  $10^{-5}$ ,  $10^{-4}$ ,  $5 \times 10^{-4}$ ,  $10^{-3}$ , 0.005, 0.01, 0.025, 0.05, 0.075, 0.1, 0.15, 0.2, 0.3, 0.5, 0.75, 1;

**40 intervals:** 0,  $5 \times 10^{-9}$ ,  $10^{-8}$ ,  $2.5 \times 10^{-8}$ ,  $5 \times 10^{-8}$ ,  $7.5 \times 10^{-8}$ ,  $10^{-7}$ ,  $5 \times 10^{-7}$ ,  $10^{-6}$ ,  $5 \times 10^{-6}$ ,  $10^{-5}$ ,  $5 \times 10^{-5}$ ,  $10^{-4}$ ,  $2.5 \times 10^{-4}$ ,  $5 \times 10^{-4}$ ,  $7.5 \times 10^{-4}$ ,  $10^{-3}$ ,  $2.5 \times 10^{-3}$ ,  $5 \times 10^{-3}$ ,  $7.5 \times 10^{-3}$ , 0.01, 0.0175, 0.025, 0.0375, 0.05, 0.0625, 0.075, 0.0875, 0.1, 0.125, 0.15, 0.175, 0.2, 0.25, 0.3, 0.4, 0.5, 0.625, 0.75, 0.875, 1.

|                                     | 3 Intervals | 5 Intervals | 10 Intervals | 20 Intervals | 40 Intervals |
|-------------------------------------|-------------|-------------|--------------|--------------|--------------|
| Mean $\hat{\sigma}_1^2$<br>(0.3)    | 0.456       | 0.357       | 0.436        | 0.442        | 0.432        |
| SD $\hat{\sigma}_1^2$               | 0.414       | 0.321       | 0.378        | 0.385        | 0.392        |
| Coverage                            | 1           | 0.95        | 0.882        | 0.852        | 0.842        |
| Mean $\hat{\pi}_{01}$<br>(0.95)     | 0.937       | 0.946       | 0.939        | 0.939        | 0.941        |
| SD $\hat{\pi}_{01}$                 | 0.051       | 0.041       | 0.045        | 0.045        | 0.045        |
| Coverage                            | 1           | 0.971       | 0.914        | 0.909        | 0.904        |
| Mean $\hat{\sigma}_{12}$<br>(0.294) | 0.290       | 0.286       | 0.291        | 0.291        | 0.292        |
| SD $\hat{\sigma}_{12}$              | 0.029       | 0.026       | 0.029        | 0.030        | 0.031        |
| Coverage                            | 0.996       | 0.960       | 0.933        | 0.935        | 0.938        |
|                                     |             |             |              |              |              |
| Mean $\hat{\sigma}_2^2$<br>(0.45)   | 0.504       | 0.521       | 0.532        | 0.583        | 0.584        |
| SD $\hat{\sigma}_2^2$               | 0.421       | 0.330       | 0.353        | 0.361        | 0.373        |
| Coverage                            | 1           | 0.960       | 0.917        | 0.917        | 0.908        |
| Mean $\hat{\pi}_{02}$<br>(0.94)     | 0.938       | 0.932       | 0.932        | 0.928        | 0.929        |
| SD $\hat{\pi}_{02}$                 | 0.046       | 0.034       | 0.036        | 0.037        | 0.038        |
| Coverage                            | 1           | 0.963       | 0.924        | 0.928        | 0.926        |
| Mean $\hat{\sigma}_{12}$<br>(0.294) | 0.286       | 0.289       | 0.291        | 0.295        | 0.296        |
| SD $\hat{\sigma}_{12}$              | 0.030       | 0.026       | 0.028        | 0.030        | 0.031        |
| Coverage                            | 0.996       | 0.979       | 0.953        | 0.954        | 0.955        |

**Table S5** : Unidirectional AVENGEME performance for estimating three parameters (true values in parentheses), under the bivariate simulation with  $N_1=N_2=10000$  (see main text). Estimation in each direction is shown. The Monte Carlo errors and  $P$ -value selection thresholds are as in Supplementary Table 2.

|                                     | 3 Intervals | 5 Intervals | 10 Intervals | 20 Intervals | 40 Intervals |
|-------------------------------------|-------------|-------------|--------------|--------------|--------------|
| Mean $\hat{\sigma}_1^2$<br>(0.3)    | 0.445       | 0.493       | 0.434        | 0.409        | 0.435        |
| SD $\hat{\sigma}_1^2$               | 0.385       | 0.298       | 0.274        | 0.258        | 0.260        |
| Coverage                            | 0.994       | 0.625       | 0.591        | 0.614        | 0.629        |
| Mean $\hat{\pi}_{01}$<br>(0.95)     | 0.938       | 0.930       | 0.935        | 0.938        | 0.935        |
| SD $\hat{\pi}_{01}$                 | 0.042       | 0.032       | 0.031        | 0.029        | 0.029        |
| Coverage                            | 0.993       | 0.626       | 0.606        | 0.627        | 0.637        |
| Mean $\hat{\sigma}_{12}$<br>(0.294) | 0.294       | 0.305       | 0.301        | 0.298        | 0.304        |
| SD $\hat{\sigma}_{12}$              | 0.051       | 0.042       | 0.043        | 0.042        | 0.043        |
| Coverage                            | 0.980       | 0.789       | 0.667        | 0.691        | 0.692        |
|                                     |             |             |              |              |              |
| Mean $\hat{\sigma}_2^2$<br>(0.45)   | 0.516       | 0.501       | 0.451        | 0.431        | 0.428        |
| SD $\hat{\sigma}_2^2$               | 0.407       | 0.269       | 0.254        | 0.245        | 0.238        |
| Coverage                            | 0.989       | 0.699       | 0.676        | 0.664        | 0.683        |
| Mean $\hat{\pi}_{02}$<br>(0.94)     | 0.936       | 0.933       | 0.938        | 0.940        | 0.940        |
| SD $\hat{\pi}_{02}$                 | 0.040       | 0.026       | 0.026        | 0.026        | 0.025        |
| Coverage                            | 0.992       | 0.725       | 0.691        | 0.694        | 0.706        |
| Mean $\hat{\sigma}_{12}$<br>(0.294) | 0.284       | 0.288       | 0.283        | 0.281        | 0.281        |
| SD $\hat{\sigma}_{12}$              | 0.054       | 0.038       | 0.040        | 0.040        | 0.040        |
| Coverage                            | 0.984       | 0.808       | 0.694        | 0.690        | 0.698        |

**Table S6** : Unidirectional AVENGEME performance for estimating three parameters (true values in parentheses), under the bivariate simulation with  $N_1=N_2=20000$  (see main text). Estimation in each direction is shown. The Monte Carlo errors and  $P$ -value selection thresholds are as in Supplementary Table 2.

|                                     | 3 Intervals | 5 Intervals | 10 Intervals | 20 Intervals | 40 Intervals |
|-------------------------------------|-------------|-------------|--------------|--------------|--------------|
| Mean $\hat{\sigma}_1^2$<br>(0.3)    | 0.526       | 0.420       | 0.386        | 0.370        | 0.362        |
| SD $\hat{\sigma}_1^2$               | 0.410       | 0.111       | 0.098        | 0.094        | 0.091        |
| Coverage                            | 0.978       | 0.436       | 0.505        | 0.576        | 0.596        |
| Mean $\hat{\pi}_{01}$<br>(0.95)     | 0.927       | 0.932       | 0.936        | 0.939        | 0.940        |
| SD $\hat{\pi}_{01}$                 | 0.044       | 0.013       | 0.012        | 0.012        | 0.012        |
| Coverage                            | 0.986       | 0.352       | 0.443        | 0.530        | 0.552        |
| Mean $\hat{\sigma}_{12}$<br>(0.294) | 0.306       | 0.307       | 0.304        | 0.302        | 0.302        |
| SD $\hat{\sigma}_{12}$              | 0.090       | 0.028       | 0.027        | 0.027        | 0.027        |
| Coverage                            | 0.965       | 0.768       | 0.689        | 0.701        | 0.697        |
|                                     |             |             |              |              |              |
| Mean $\hat{\sigma}_2^2$<br>(0.45)   | 0.541       | 0.513       | 0.472        | 0.452        | 0.444        |
| SD $\hat{\sigma}_2^2$               | 0.421       | 0.140       | 0.131        | 0.126        | 0.124        |
| Coverage                            | 0.979       | 0.711       | 0.690        | 0.701        | 0.685        |
| Mean $\hat{\pi}_{02}$<br>(0.94)     | 0.932       | 0.929       | 0.934        | 0.936        | 0.937        |
| SD $\hat{\pi}_{02}$                 | 0.042       | 0.015       | 0.014        | 0.014        | 0.014        |
| Coverage                            | 0.984       | 0.679       | 0.706        | 0.728        | 0.731        |
| Mean $\hat{\sigma}_{12}$<br>(0.294) | 0.276       | 0.293       | 0.288        | 0.286        | 0.285        |
| SD $\hat{\sigma}_{12}$              | 0.087       | 0.030       | 0.030        | 0.030        | 0.030        |
| Coverage                            | 0.971       | 0.848       | 0.731        | 0.691        | 0.685        |

**Table S7** : Unidirectional AVENGEME performance for estimating three parameters (true values in parentheses), under the bivariate simulation with  $N_1=N_2=40000$  (see main text). Estimation in each direction is shown. The Monte Carlo errors and  $P$ -value selection thresholds are as in Supplementary Table 2.



|                                     | 5 Intervals | 10 Intervals | 20 Intervals | 40 Intervals |
|-------------------------------------|-------------|--------------|--------------|--------------|
| Mean $\hat{\sigma}_1^2$<br>(0.3)    | 0.398       | 0.364        | 0.347        | 0.340        |
| SD $\hat{\sigma}_1^2$               | 0.083       | 0.075        | 0.072        | 0.069        |
| Coverage                            | 0.385       | 0.522        | 0.579        | 0.606        |
| Mean $\hat{\pi}_{01}$<br>(0.95)     | 0.935       | 0.939        | 0.942        | 0.942        |
| SD $\hat{\pi}_{01}$                 | 0.010       | 0.010        | 0.009        | 0.009        |
| Coverage                            | 0.295       | 0.450        | 0.544        | 0.574        |
| Mean $\hat{\sigma}_2^2$<br>(0.45)   | 0.563       | 0.526        | 0.507        | 0.499        |
| SD $\hat{\sigma}_2^2$               | 0.104       | 0.097        | 0.094        | 0.092        |
| Coverage                            | 0.472       | 0.569        | 0.622        | 0.64         |
| Mean $\hat{\pi}_{02}$<br>(0.94)     | 0.926       | 0.930        | 0.932        | 0.932        |
| SD $\hat{\pi}_{02}$                 | 0.011       | 0.010        | 0.010        | 0.010        |
| Coverage                            | 0.386       | 0.512        | 0.585        | 0.608        |
| Mean $\hat{\sigma}_{12}$<br>(0.294) | 0.307       | 0.304        | 0.302        | 0.301        |
| SD $\hat{\sigma}_{12}$              | 0.022       | 0.022        | 0.022        | 0.022        |
| Coverage                            | 0.771       | 0.686        | 0.695        | 0.701        |

**Table S8** : Bidirectional AVENGEME performance for estimating five parameters (true values in parentheses), under the bivariate simulation with  $N_1=N_2=40000$  (see main text). The Monte Carlo errors and  $P$ -value selection thresholds are as in Supplementary Table 2. No results for 3 intervals are shown as the number of intervals must be at least equal to the number of estimated parameters, in this case 5.

## References

- SCHIZOPHRENIA WORKING GROUP OF THE PSYCHIATRIC GENOMICS CONSORTIUM 2014. Biological insights from 108 schizophrenia-associated genetic loci. *Nature*, 511, 421-7.
- STAHL, E. A., WEGMANN, D., TRYNKA, G., GUTIERREZ-ACHURY, J., DO, R., VOIGHT, B. F., KRAFT, P., CHEN, R., KALLBERG, H. J., KURREEMAN, F. A., KATHIRESAN, S., WIJMENGA, C., GREGERSEN, P. K., ALFREDSSON, L., SIMINOVITCH, K. A., WORTHINGTON, J., DE BAKKER, P. I., RAYCHAUDHURI, S. & PLENGE, R. M. 2012. Bayesian inference analyses of the polygenic architecture of rheumatoid arthritis. *Nat Genet*, 44, 483-9.
